# Supplementary material
Source: MDPI journal article supplement (https://www.mdpi.com/2227-9717/10/8/1629)
Supplement: s1 [file s1]

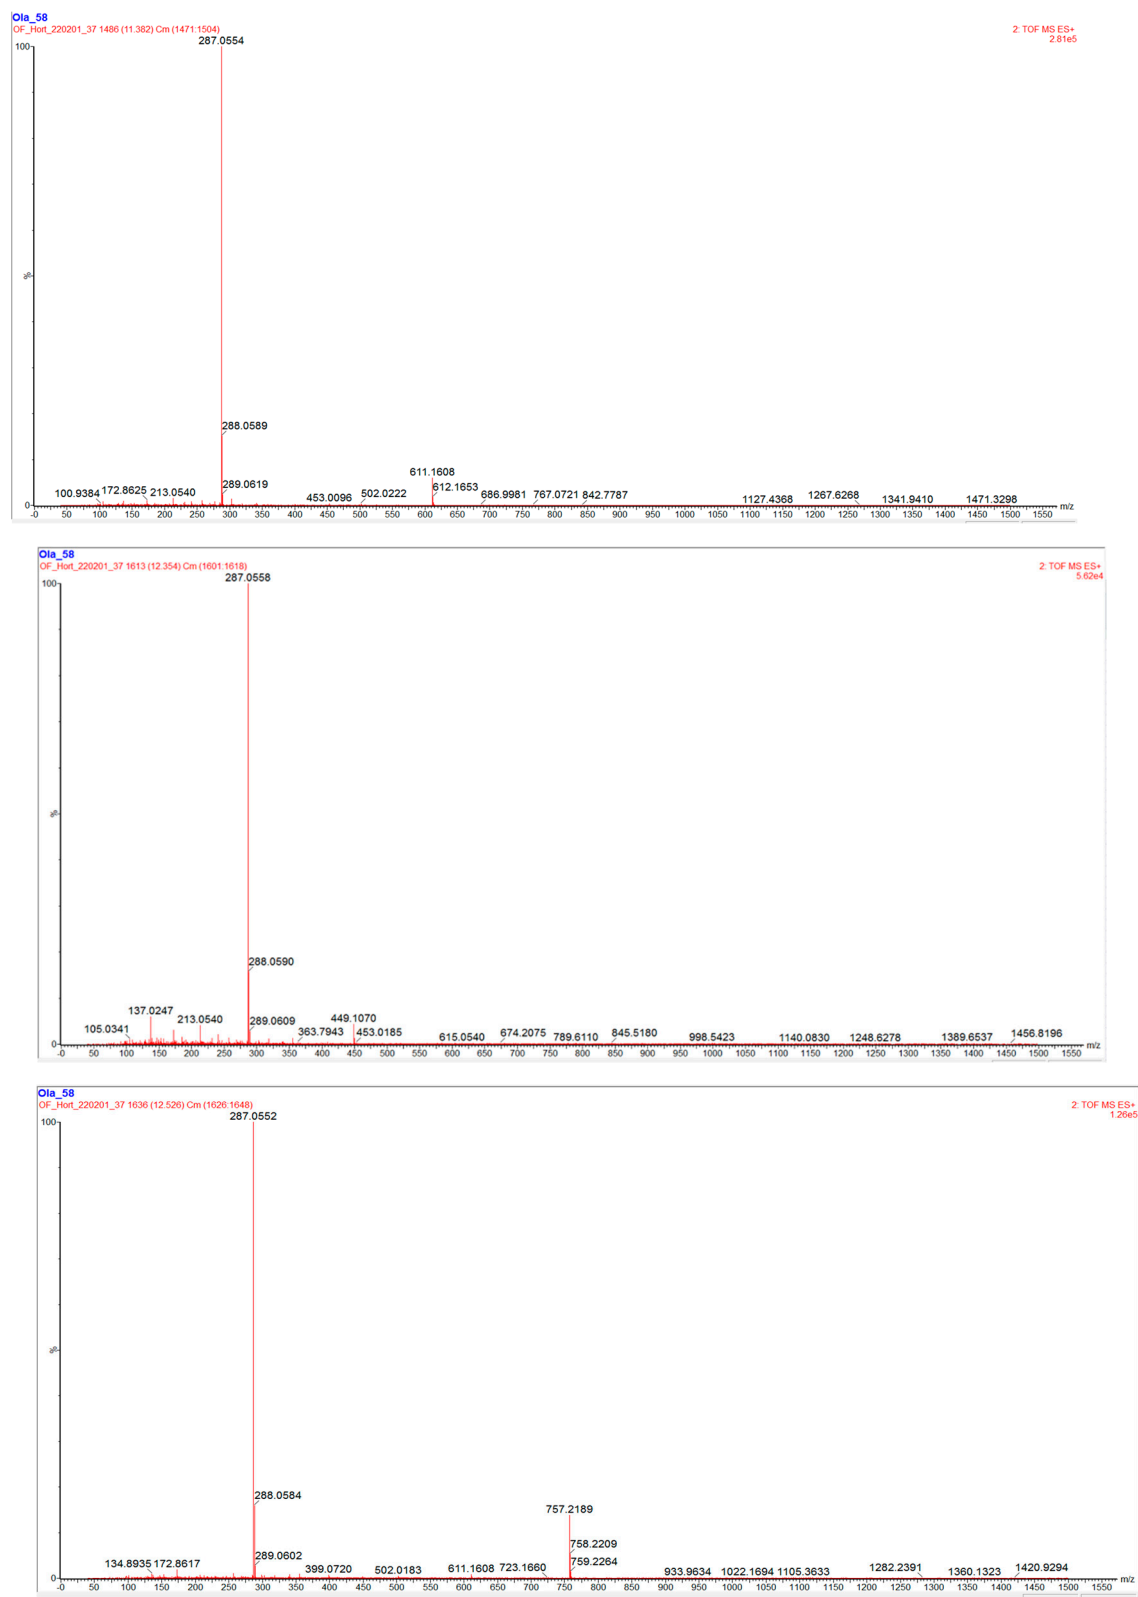

**Figure S1.** Mass spectra of some of the identified anthocyanin compounds (**A**) Mass spectra of Cyanidin dihexoside showing an observed  $m/z$  611.161 in all the dried raspberries; (**B**) Mass spectra of Cyanidin 3-O-galactoside showing an observed  $m/z$  449.1082 in all the dried raspberries; (**C**) Mass spectra of Cyanidin 3-O-glucosyl-rutinoside showing an  $m/z$  757.217 in all the oven-dried 60 °C for 24 h) raspberries.

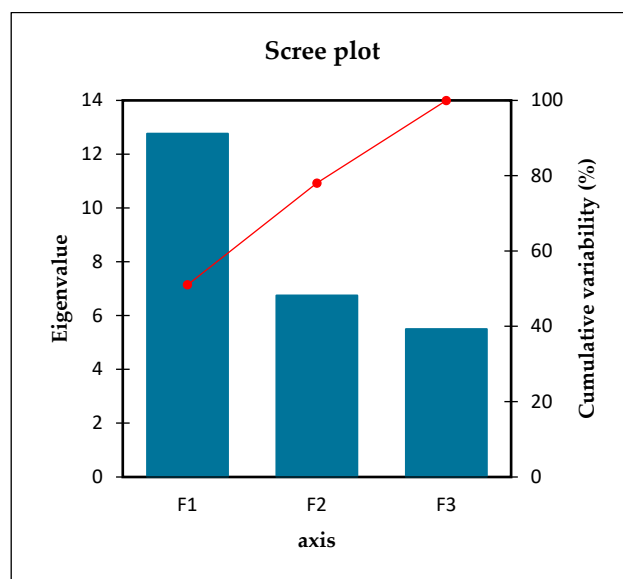

**Figure S2.** Scree plot of variance explained by each factor of the principal component

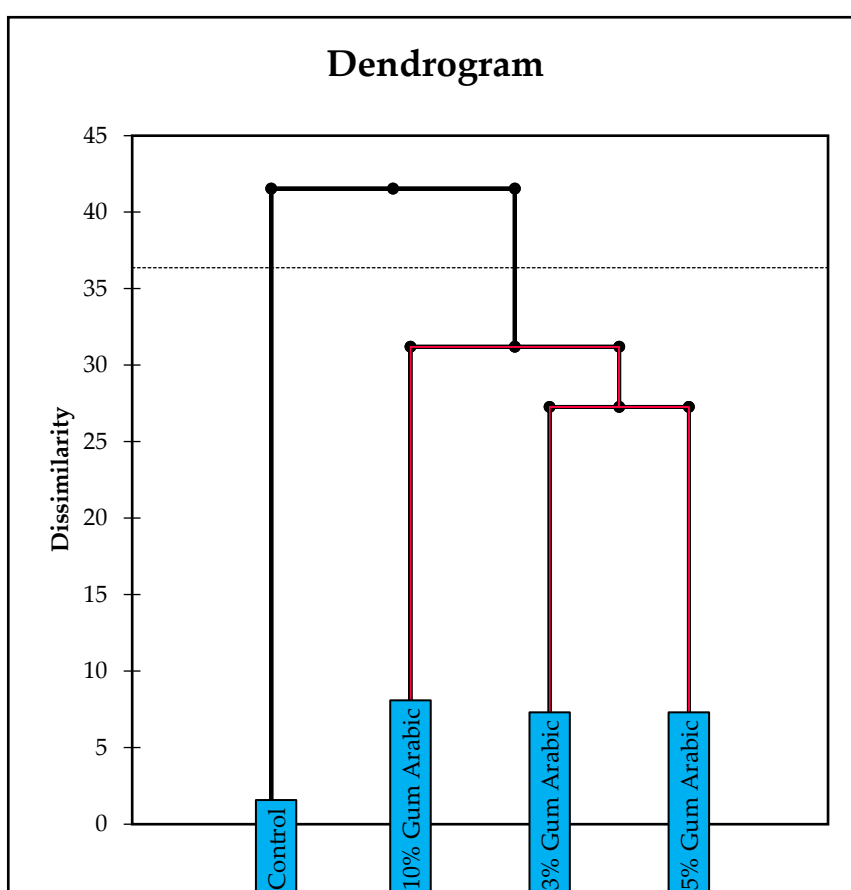

**Figure S3.** Agglomerative Hierarchical Clustering (AHC) dendrograms for the control, GA-pretreated and oven-dried (60 °C for 24 h) raspberries.
